# Supplementary material for: Unveiling the chemical reconstruction of Fe(OH) 3 -embedded Ni-MOF nanorods for enhanced oxygen evolution reaction
Source: Royal Society of Chemistry journal article supplement (doi:10.1039/d5ta01061f), 2025-01-01
Supplement: d5ta01061f1.pdf [file d5ta01061f1.pdf]

## *Supporting Information*

### **Unveiling the Chemical Reconstruction of Fe(OH)<sub>3</sub>-Embedded Ni-MOF Nanorods for Enhanced Oxygen Evolution Reaction**

Da Ye,<sup>†</sup> Luhong Fu,<sup>†</sup> Yan Tang,<sup>†</sup> Ding Zhang, Teng Liu\*

#### **Corresponding Author**

**Teng Liu** — School of Chemical Engineering and Pharmacy

Wuhan Institute of Technology Wuhan, Hubei 430205, P. R. China

Email: [tliu@wit.edu.cn](mailto:tliu@wit.edu.cn)

#### **1. Materials and Methods**

##### ***Materials***

Ni(NO<sub>3</sub>)<sub>2</sub>·6H<sub>2</sub>O, FeCl<sub>3</sub>, NH<sub>4</sub>F, urea and imidazole are all analytical pure from Shanghai Aladdin Biochemical Technology, China. Nickel foam (NF) was purchased from Suzhou Ke Sheng Metal Materials company, China. Nafion solution (5% in isopropanol) was supplied by Sigma-Aldrich, Germany.

##### ***Synthesis of Ni(OH)<sub>2</sub>***

The nickel foam (NF) was ultrasonically cleaned in acetone, ethanol, 3 M HCl and ultrapure (UP) water for 10 minutes each. A solution was prepared by dissolving 1 mmol Ni(NO<sub>3</sub>)<sub>2</sub>·6H<sub>2</sub>O, 4 mmol NH<sub>4</sub>F, and 5 mmol CO(NH<sub>2</sub>)<sub>2</sub> in 15 mL UP water and transferred to a 22 mL Teflon-sealed autoclave. A piece of cleaned NF was diagonally placed in the solution, then it was heated to 120 °C at a rate of 5 °C / min and maintained for 8 h. After natural cooling, the NF was rinsed three times with UP water, yielding Ni(OH)<sub>2</sub> grown on the NF.

##### ***Synthesis of Ni-MOF***

A circular quartz tube (2.5 cm in diameter, 10 cm in length) was used as the reaction vessel. Imidazole powder (10 mmol) was placed at the sealed end, with a piece of nickel foam (NF) coated with Ni(OH)<sub>2</sub> positioned at the tube's midpoint. The system was then heated to 280 °C at a rate of 5 °C/min under a nitrogen atmosphere in a tube furnace and held at this temperature for 1 hour. After natural cooling, the Ni-MOF grown on NF was carefully retrieved from the quartz tube.

##### ***Synthesis of Fe/Ni-MOF***

The Ni-MOF was etched using a 0.15 M FeCl<sub>3</sub> solution for 15 minutes at room temperature. The resulting product was then thoroughly washed with UP water until the filtrate turned colorless, followed by drying in a vacuum oven to obtain Fe/Ni-MOF grown on NF. Control samples were prepared by etching Ni-MOF in FeCl<sub>3</sub> solutions of varying concentrations (0.01, 0.05, 0.1, 0.2, and 0.25 M) for 15 minutes, or by treating with 0.15 M FeCl<sub>3</sub> solution for 5, 10, 20, and 25 minutes to determine the optimal etching conditions.

##### ***Synthesis of Fe/Ni(OH)<sub>2</sub>***

Fe/Ni(OH)<sub>2</sub> grown on NF was prepared following a similar protocol to that used for

Fe/Ni-MOF, with the primary difference being the substitution of Ni-MOF with Ni(OH)<sub>2</sub>.

## **Electrochemical Measurements**

### ***Potential Calibration***

All electrochemical measurements were conducted on a CHI-760E electrochemical workstation with a conventional three-electrode configuration in 1 M KOH. Potentials were calibrated to the reversible hydrogen electrode (RHE) using the equation:

$$E_{RHE} = E_{measured} - \Delta V - 50\%iR$$

The zero intercept ( $\Delta V$ , -0.919 V) was determined through the cyclic voltammetry (CV) of the hydrogen electrode reaction of Pt in 1 M KOH saturated with H<sub>2</sub>. The electrolyte resistance (R) was approximately 1.7  $\Omega$ , and all the potential has been calibrated to RHE ( $E_{RHE}$ ).

### ***Electrode Preparation***

A Hg/HgO electrode (filled with 1 M KOH) and a carbon rod (5 mm diameter, 8 cm length) were served as the reference and counter electrode, respectively. Ni(OH)<sub>2</sub>, Ni-MOF, Fe/Ni(OH)<sub>2</sub>, and Fe/Ni-MOF samples (1 cm  $\times$  1 cm) were directly affixed to the working electrode for electrochemical tests. Specifically, the working electrode is clamped with an electrode clamp, and the exposed portion (0.6 cm  $\times$  1 cm) of the electrode is just immersed into the solution. For IrO<sub>2</sub>, a conventional electrocatalyst ink was prepared and deposited onto a rotating disk electrode (RDE) with a loading of 0.5 mg/cm<sup>2</sup>, using several drops of 0.1% Nafion solution to secure the electrocatalyst on the electrode.

### ***Electrochemical Test Methods***

Prior to characterization, all electrocatalysts underwent an activation process, which involved continuous CV scanning from 1.22 V to 1.77 V at a rate of 0.5 V/s until the last two cycles converged. CV curves were recorded from 1.22 V to 1.77 V at a scanning rate of 2 mV/s, with the negative-sweep half-cycle taken as the LSV curves. Tafel plots were generated from the linear regions of the LSV curves at low overpotentials and fitted to the Tafel equation:

$$\eta = b \log j + a$$

where  $\eta$  is overpotential,  $j$  is current density, and  $b$  is the Tafel slope.

Electrochemical impedance spectroscopy (EIS) measurements were performed at the open circuit potential (OCP). The current density near OCP showed a linear dependence on scanning rates, with the slope used to estimate the double-layer capacitance ( $C_{dl}$ ). CVs were conducted over the range OCP  $\pm$  50 mV with scanning rates of 20, 40, 60, 80, 100, 120, and 140 mV/s, measuring current density at OCP to determine  $C_{dl}$ . The electrochemically active surface areas (ECSA) of Ni(OH)<sub>2</sub>, Ni-MOF, Fe/Ni(OH)<sub>2</sub>, and Fe/Ni-MOF were calculated as:

$$ECSA = C_{dl}/C_s$$

where  $C_s$  is the specific capacitance, treated as a constant for similar materials. Continuous CV was conducted from 1.22 to 1.77 V at a scan rate of 50 mV/s.

Chronoamperometric tests on Fe/Ni-MOF were performed at current densities of 10, 100, and 200 mA/cm<sup>2</sup>.

In-situ Raman and UV spectra were collected after 20 minutes of operation at the specified voltages.

## 2. First-Principal Calculation

Density functional theory (DFT) calculations were conducted using the CASTEP module within the Materials Studio program developed by Bio Accelrys. The exchange-correlation interactions were modeled using the generalized gradient approximation (GGA) with the Perdew-Burke-Ernzerh (PBE) functional.<sup>1, 2</sup> Ultrasoft pseudopotentials were employed to account for interactions between valence electrons and ionic cores. The crystal structure of NiFe layered double hydroxide (LDH) was adopted from the literature.<sup>3</sup>

A four-layer  $2 \times 2$  supercell of (001) slabs, both with and without an adsorbed carbonate ion, was constructed to simulate NiFe LDH and  $\text{CO}_3\text{-NiFe LDH}$ , respectively. In this configuration, each of the carbonate ion's oxygen atoms bonds to a Ni and an Fe atom, while the Ni/Fe atomic ratio remains 1:1. For each model, a vacuum gap of 15 Å was applied, with the atoms in the bottom two layers fixed and all other atoms fully optimized. Electronic wave functions were expanded on a plane wave basis with a cut-off energy of 380 eV, while a  $2 \times 2 \times 1$  Monkhorst-Pack grid k-point sampling was used for geometric optimizations. The convergence thresholds were set to  $1 \times 10^{-6}$  eV in energy and 0.02 eV/Å in force. Additionally, van der Waals interactions were described using the DFT-D2 method by Grimme.<sup>4</sup>

The adsorption free energies for intermediates  $\text{OH}_{\text{ad}}$ ,  $\text{O}_{\text{ad}}$ , and  $\text{OOH}_{\text{ad}}$  were calculated using the formula  $\Delta G = \Delta E + \Delta \text{ZPE} - T\Delta S$ , where  $\Delta E$ ,  $\Delta \text{ZPE}$ , and  $\Delta S$  correspond to the binding energy, zero-point energy change, and entropy change of the adsorption process, respectively.<sup>5, 6</sup>

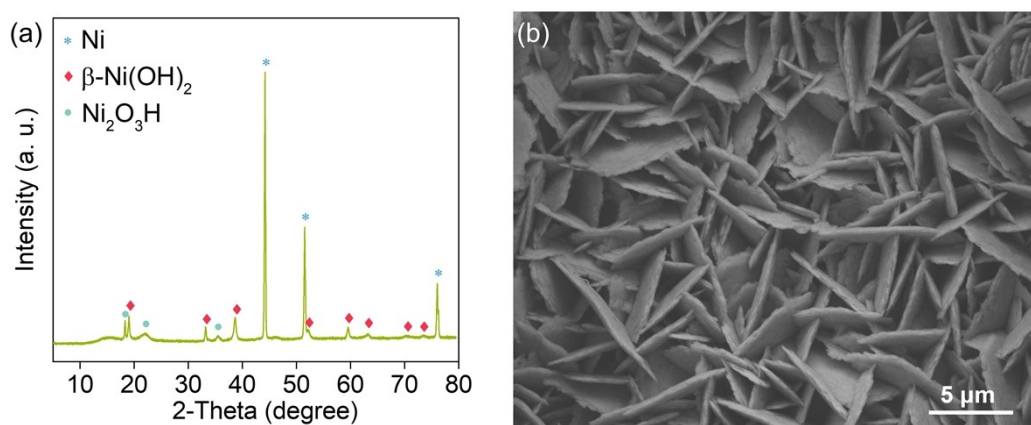

**Figure S1** (a) XRD patterns and (b) SEM image of  $\text{Ni(OH)}_2$ .

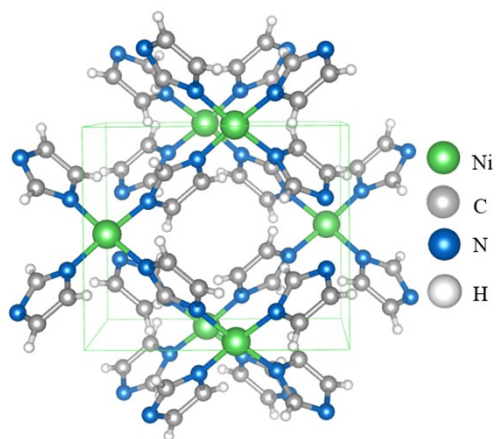

**Figure S2** Unit cell atom model of Ni-MOF.

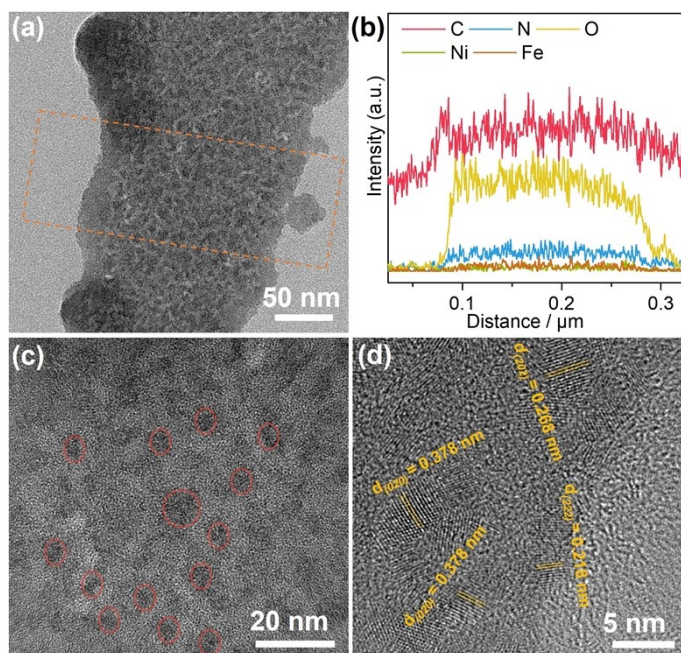

**Figure S3** TEM image (a), line scanning (b), HRTEM image, HRTEM image with lattice spacing (d) of Fe/Ni-MOF. Red circle in (c): Fe(OH)<sub>3</sub> nanoparticles.

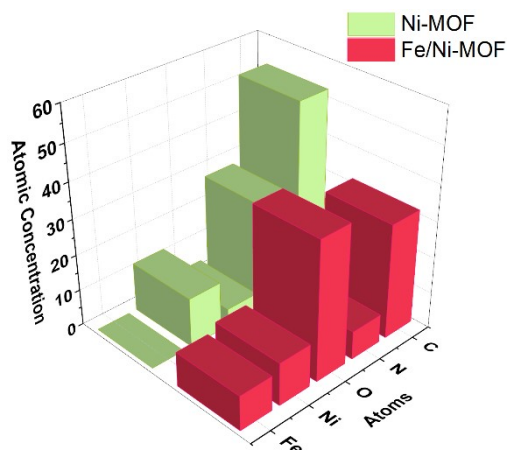

**Figure S4** The atomic concentrations of C, N, O, Ni, and Fe in Fe/Ni-MOF compared with Ni-MOF.

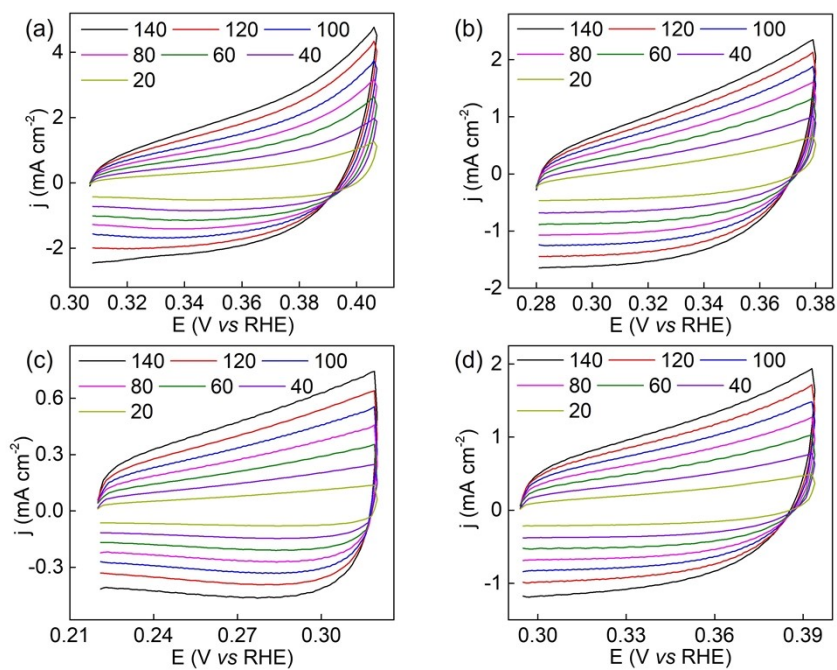

**Figure S5** CV curves between OCP  $\pm$  50 mV for Ni(OH)<sub>2</sub> (a), Fe/Ni(OH)<sub>2</sub> (b), Ni-MOF(c) and Fe/Ni-MOF(d) at scan rates of 20, 40, 60, 80, 100, 120, 140 mV s<sup>-1</sup>.

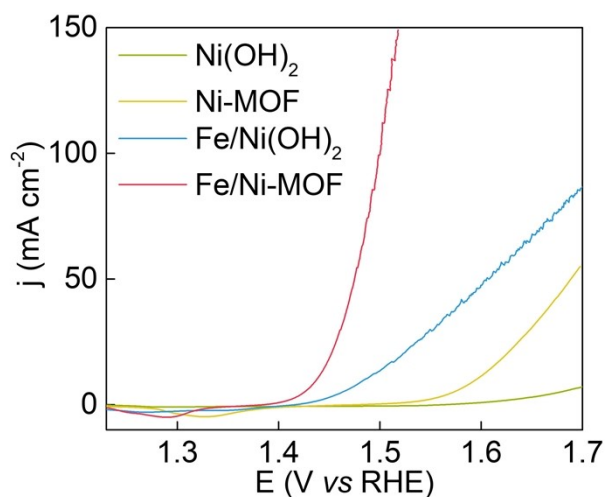

**Figure S6** ECSA-normalized LSV curves of Ni(OH)<sub>2</sub> (a), Fe/Ni(OH)<sub>2</sub> (b), Ni-MOF(c) and Fe/Ni-MOF(d).

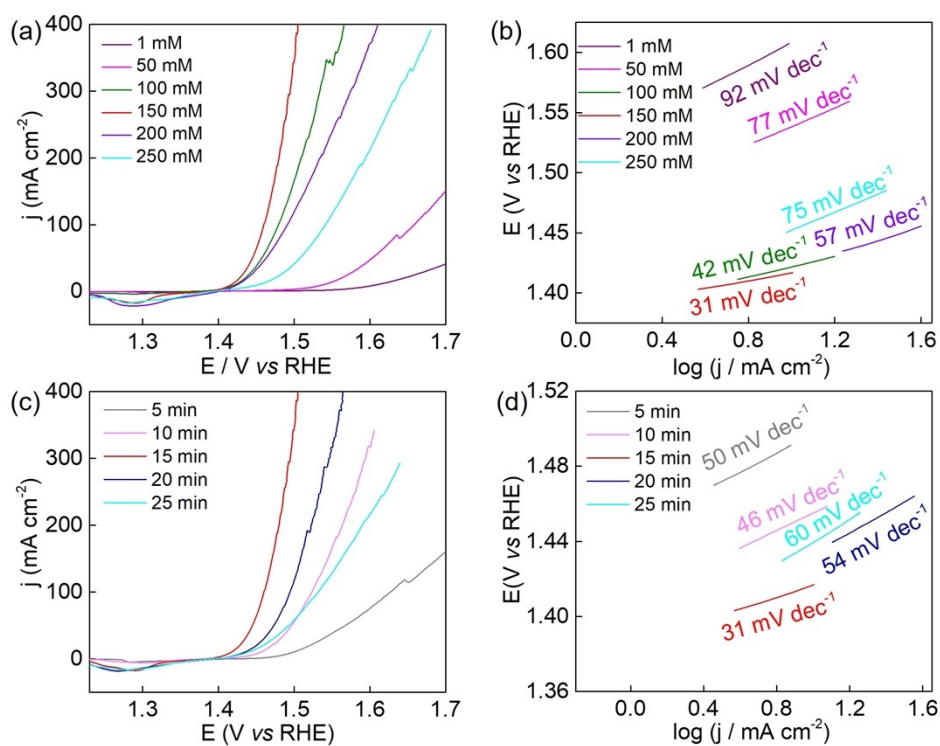

**Figure S7** LSV curves (a) and Tafel plots (b) of Ni-MOF immersed in FeCl<sub>3</sub> solution with various concentrations (1 mM to 250 mM) for 15 minutes. LSV curves (c) and Tafel plots (d) of Ni-MOF immersed in 0.15 M FeCl<sub>3</sub> solution for durations ranging from 5 to 25 minutes.

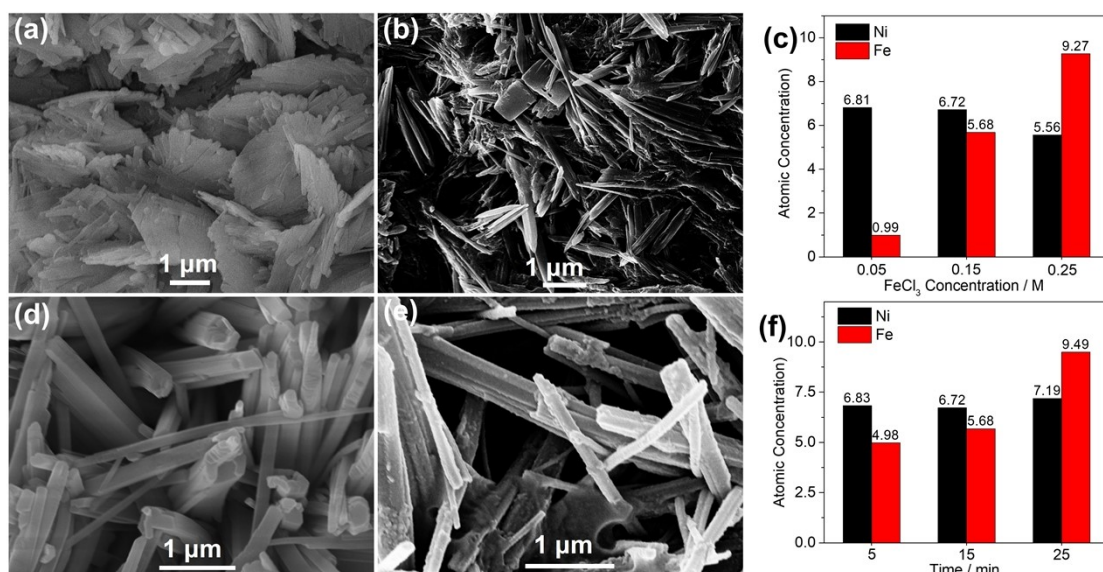

**Figure S8** SEM images of Fe/Ni-MOF etching with 0.05 M (a) and 0.25 M (b)  $\text{FeCl}_3$  for 15 min, and 0.15 M for 5 min (d) and 25 min (e). ICP-OER results of Fe/Ni-MOF etching with 0.05/0.15/0.25 M  $\text{FeCl}_3$  for 15 min (c) and 0.15 M for 5/15/25 min (e).

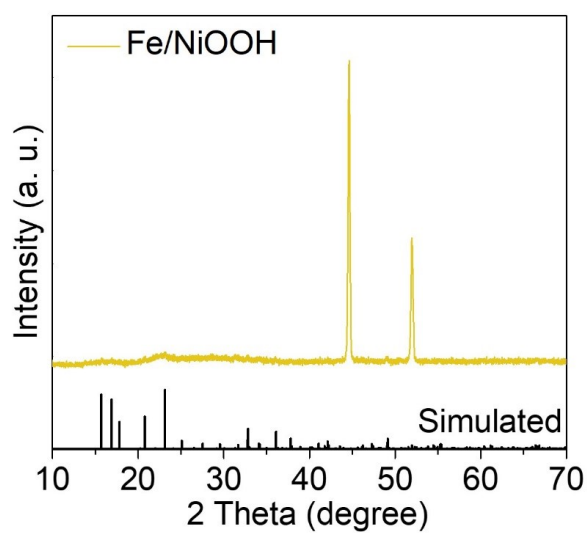

**Figure S9** XRD pattern of Fe/NiOOH.

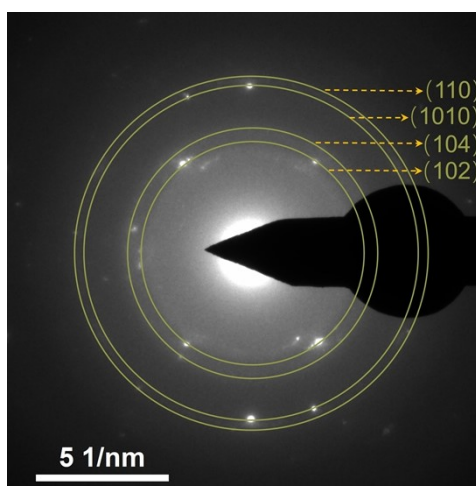

**Figure S10** The selected area electron diffraction (SAED) pattern of Fe/NiOOH.

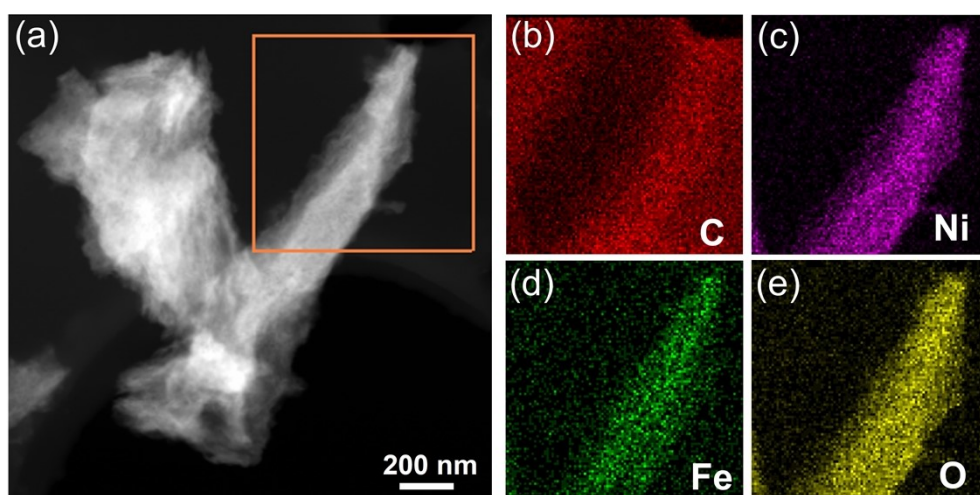

**Figure S11** HAADF-STEM (a), EDS elemental mapping of C (b), Ni (c), Fe (d) and O (e) of Fe/NiOOH.

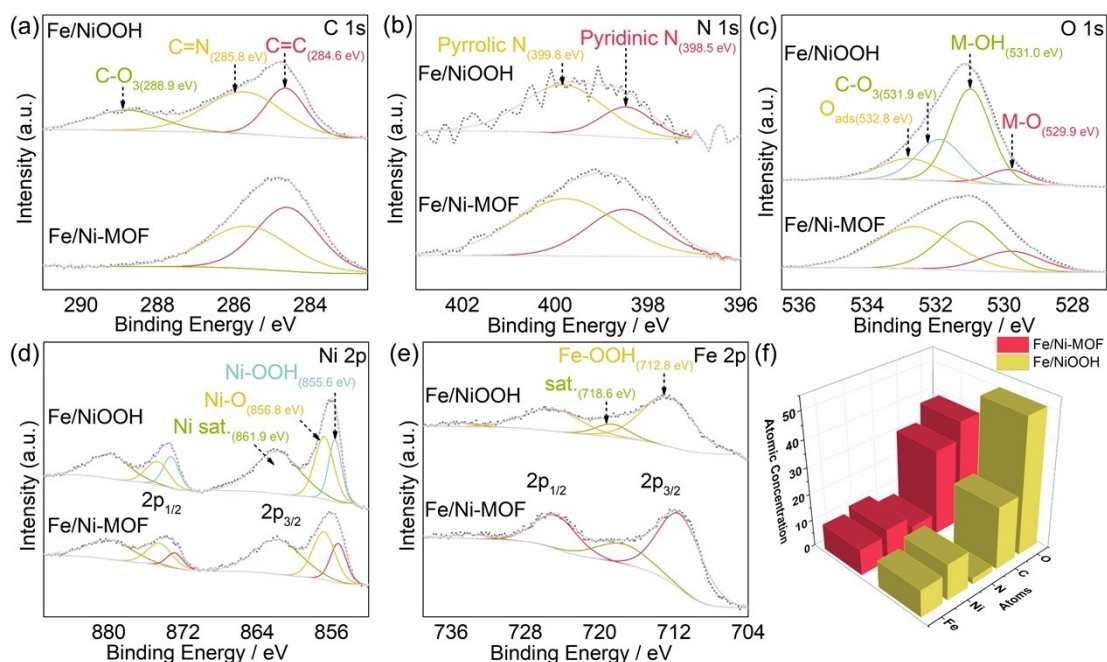

**Figure S12** The high-resolution XPS spectra of C 1s (a), N 1s (b), O 1s (c), Ni 2p (d), Fe 2p (e) and the atomic concentrations of O, C, N, Ni and Fe (f) of Fe/Ni-MOF and Fe/NiOOH.

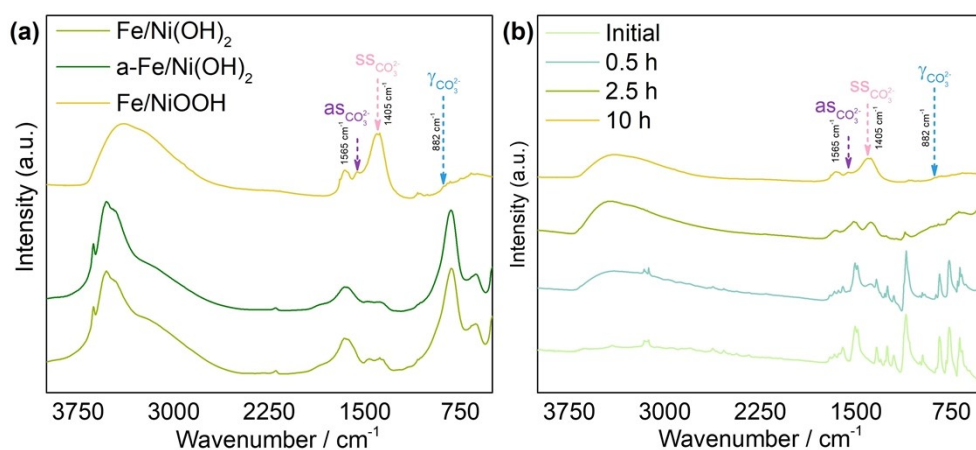

**Figure S13** FT-IR spectroscopy of Fe/Ni(OH)<sub>2</sub>, a-Fe/Ni(OH)<sub>2</sub> and Fe/NiOOH (a), and Fe/NiOOH with different durations at current density of 200 mA cm<sup>-2</sup> (b).

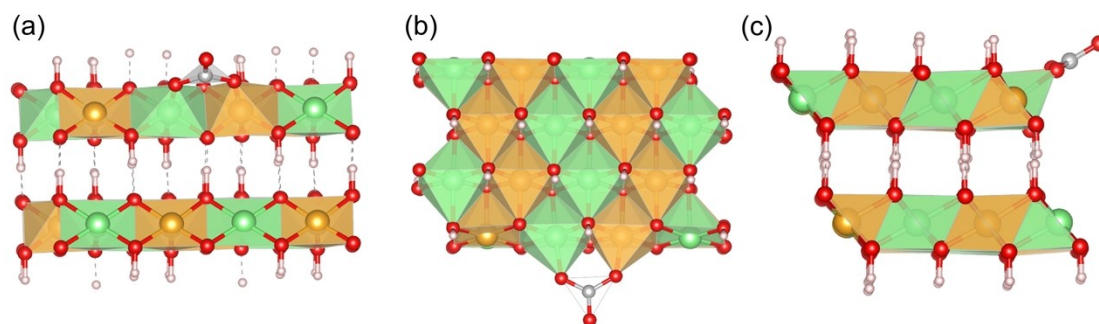

**Figure S14** The front view (a), top view (b), and side view (c) of  $\text{CO}_3^{2-}$ -adsorbed Fe/NiOOH models.

**Table S1** Atomic parameters of Ni-MOF.

| Phase data        |                                         |      |           |             |             |        |
|-------------------|-----------------------------------------|------|-----------|-------------|-------------|--------|
| Space-group       | P b c n (60) - orthorhombic             |      |           |             |             |        |
| Cell              | a=7.388(3) Å b=8.755(4) Å c=10.489(4) Å |      |           |             |             |        |
|                   | a/b=0.8439 b/c=0.8347 c/a=1.4197        |      |           |             |             |        |
|                   | V=678.45(50) Å³ Z=4                     |      |           |             |             |        |
| Atomic parameters |                                         |      |           |             |             |        |
| Atom              | Wyck.                                   | Site | x/a       | y/a         | z/c         | U [Å²] |
| Ni1               | 4c                                      | .2.  | 0         | 0.56710(3)  | 1/4         |        |
| N1                | 8d                                      | 1    | 0.1592(2) | 0.41864(15) | 0.31673(16) |        |
| N2                | 8d                                      | 1    | 0.3531(2) | 0.22466(15) | 0.31590(15) |        |
| C1                | 8d                                      | 1    | 0.2163(2) | 0.20191(19) | 0.2571(2)   |        |
| H1                | 8d                                      | 1    | 0.167(3)  | 0.258(2)    | 0.182(2)    | 0.0270 |
| C2                | 8d                                      | 1    | 0.2686(3) | 0.4305(2)   | 0.4221(2)   |        |
| H2                | 8d                                      | 1    | 0.254(4)  | 0.509(2)    | 0.482(2)    | 0.0330 |
| C3                | 8d                                      | 1    | 0.3865(3) | 0.3125(2)   | 0.42149(19) |        |
| H3                | 8d                                      | 1    | 0.487(3)  | 0.288(2)    | 0.478(2)    | 0.0320 |

**Table S2.** Comparisons of OER performance for various electrocatalysts in 1.0 M KOH from other publications

| Catalyst                    | Overpotential @10 mA  | Tafel slope             |             |
|-----------------------------|-----------------------|-------------------------|-------------|
|                             | $\text{cm}^{-2}$ [mV] | [mV $\text{dec}^{-1}$ ] |             |
| Fe/Ni-MOF                   | 188                   | 32                      | (this work) |
| Co-C/ZIF@CC (0.4 W)         | 290                   | 59                      | 7           |
| (Ni,Fe)P(S,Se) <sub>3</sub> | 210                   | 34                      | 8           |

|                                                                              |     |      |    |
|------------------------------------------------------------------------------|-----|------|----|
| Co/Aza-CMP/CP                                                                | 289 | 44   | 9  |
| a-NiCo/NC                                                                    | 252 | 49   | 10 |
| CoFe-N-C                                                                     | 360 | 68   | 11 |
| W-NiS <sub>0.5</sub> Se <sub>0.5</sub>                                       | 171 | 41   | 12 |
| CoFeWO <sub>x</sub>                                                          | 211 | 32   | 13 |
| Ni/NiFeMoO <sub>x</sub>                                                      | 255 | 35   | 14 |
| Ni-ZIF/Ni-B@nf                                                               | 234 | 57   | 15 |
| NiTe/NiS                                                                     | 209 | 49   | 16 |
| VCoCO <sub>x</sub> @NF                                                       | 240 | 64   | 17 |
| CuO@CoOOH/CF                                                                 | 186 | 51.7 | 18 |
| (Ni <sub>2</sub> Co <sub>1</sub> ) <sub>0.925</sub> Fe <sub>0.075</sub> -MOF | 257 | 41.3 | 19 |

## References

1. D. Vanderbilt, *Phys. Rev. B*, 1990, **41**, 7892-7895.
2. J. P. Perdew, K. Burke and M. Ernzerhof, *Phys. Rev. Lett.*, 1996, **77**, 3865.
3. Q. Hu, Y. F. Xue, J. X. Kang, I. Scivetti, G. Teobaldi, A. Selloni, L. Guo and L.-M. Liu, *ACS Catal.*, 2021, **12**, 295-304.
4. S. Grimme, *J. Comput. Chem.*, 2006, **27**, 1787-1799.
5. P. Ferrin, A. U. Nilekar, J. Greeley, M. Mavrikakis and J. Rossmeisl, *Surf. Sci.*, 2008, **602**, 3424-3431.
6. J. K. Nørskov, T. Bligaard, A. Logadottir, J. Kitchin, J. G. Chen, S. Pandalov and U. Stimming, *J. Electrochem. Soc.*, 2005, **152**, J23.
7. W. H. Liu, J. Yang, Y. Z. Zhao, X. M. Liu, J. Heng, M. H. Hong, Y. W. Zhang and J. Wang, *Adv. Mater.*, 2023, **36**, 2310106.
8. W. W. Li, C. Li, H. L. Dong, X. L. Zhang, J. X. Liu, M. Song, G. Wang, L. Zhao, H. W. Sheng, B. Chen and H. Z. Zhang, *Angew. Chem. Int. Ed.*, 2023, **62**, e202214570.
9. H. Yang, F. S. Li, S. Q. Zhan, Y. W. Liu, W. L. Li, Q. J. Meng, A. Kravchenko, T. Q. Liu, Y. Yang, Y. Fang, L. Q. Wang, J. Q. Guan, I. Furó, M. S. G. Ahlquist and L. C. Sun, *Nat. Catal.*, 2022, **5**, 414-429.
10. Z. H. Pei, X. F. Lu, H. B. Zhang, Y. X. Li, D. Y. Luan and X. W. Lou, *Angew. Chem. Int. Ed.*, 2022, **61**, e202207537.
11. X. Y. Zhou, J. J. Gao, Y. X. Hu, Z. Y. Jin, K. L. Hu, K. M. Reddy, Q. H. Yuan, X. Lin and H.-J. Qiu, *Nano. Lett.*, 2022, **22**, 3392-3399.
12. Y. Wang, X. P. Li, M. M. Zhang, J. F. Zhang, Z. L. Chen, X. R. Zheng, Z. L. Tian, N. Q. Zhao, X. P. Han, K. Zaghib, Y. Wang, Y. D. Deng and W. B. Hu, *Adv. Mater.*, 2022, **34**, 2107053.
13. J. S. Chen, H. Li, Z. X. Yu, C. Liu, Z. W. Yuan, C. J. Wang, S. L. Zhao, G. Henkelman, S. Z. Li, L. Wei and Y. Chen, *Adv. Energy. Mater.*, 2020, **10**, 2002593.
14. Y. K. Li, G. Zhang, W. T. Lu and F. F. Cao, *Adv. Sci.*, 2020, **7**, 1902034.

15. H. B. Xu, B. Fei, G. H. Cai, Y. Ha, J. Liu, H. X. Jia, J. C. Zhang, M. Liu and R. B. Wu, *Adv. Energy. Mater.*, 2020, **10**, 1902714.
16. Z. Q. Xue, X. Li, Q. L. Liu, M. K. Cai, K. Liu, M. Liu, Z. F. Ke, X. L. Liu and G. Q. Li, *Adv. Mater.*, 2019, **31**, 1900430.
17. A. Meena, P. Thangavel, A. S. Nissimagoudar, A. N. Singh, A. Jana, D. S. Jeong, H. Im and K. S. Kim, *Chem. Eng. J.*, 2022, **430**, 132623.
18. J. Hu, A. Al - Salihi, J. Wang, X. Li, Y. F. Fu, Z. H. Li, X. J. Han, B. Song and P. Xu, *Adv. Sci.*, 2021, **8**, 2103314.
19. Q. Z. Qian, Y. P. Li, Y. Liu, L. Yu and G. Q. Zhang, *Adv. Mater.*, 2019, **31**, 1901139.
